# Supplementary material for: A proposed protocol based on integrative metabonomics analysis for the rapid detection and mechanistic understanding of sulfur fumigation of Chinese herbal medicines
Source: Royal Society of Chemistry journal article supplement (doi:10.1039/c9ra05032a), 2019-01-01
Supplement: c9ra05032a1.pdf [file c9ra05032a1.pdf]

**A proposal protocol based on integrative metabonomics analysis for  
the rapid discrimination and mechanism explanation of sulfur  
fumigated Chinese herbal medicines**

**Dai Shengyun<sup>1,2</sup>, Wang Yuqi<sup>1</sup>, Wang Fei<sup>1,3</sup>, Mei Xiaodan<sup>1</sup>, Zhang Jiayu<sup>4,5,\*</sup>**

<sup>1</sup> *School of Chinese Pharmacy, Beijing University of Chinese Medicine, Beijing  
102488, China*

<sup>2</sup> *National Institute of Food and Drug Control, Beijing 100050, China*

<sup>3</sup> *Department of Pharmacy, People Hospital of Peking University, Beijing 100044,  
China*

<sup>4</sup> *Beijing Research Institute of Chinese Medicine, Beijing University of Chinese  
Medicine, Beijing 100029, China*

<sup>5</sup> *School of pharmacy, Binzhou Medical University, Yantai 264003, China;*

\*Correspondence and requests for materials should be addressed to Zhang  
Jiayu. (email: [zhangjiayu0615@163.com](mailto:zhangjiayu0615@163.com) )

## **Supplementary material**

### **Data-acquisition method**

#### **HPLC-DAD conditions**

The chromatographic separation was achieved on an Agilent 1260 Infinity II system (Agilent, USA) with Agilent TC-C<sub>18</sub> column (4.6 × 250 mm, 5 μm; Agilent, USA) at 25°C. The mobile phase consisted of 0.4% phosphoric acid (solvent A) and acetonitrile (solvent B), and the linear gradient was as follows: 0-20 min, 3%-15% B; 20-45 min, 15%-24% B; 45-55 min, 24%-40% B; 55-60 min, 40%-3% B. The flow rate was 1.0 mL·min<sup>-1</sup> and the injection volume was 10 μL. The DAD detection wavelengths were 238 nm, 254 nm, 280 nm and 330 nm. All the samples were randomly coded and subjected into HPLC system, whose stability was validated by running the QC sample every 5 samples during the data-acquisition process.

#### **NIR conditions**

An Antaris Nicolet FT-NIR analyzer (Thermo Fisher Scientific Inc., USA) with integrating sphere diffuse reflectance mode was employed to obtain the NIR spectra at a spectral resolution of 8 cm<sup>-1</sup> with 32 scans. The wavelength range of spectra was from 10,000 cm<sup>-1</sup> to 4,000 cm<sup>-1</sup>. To acquire the representative spectrum, each sample was separately scanned three times and the average spectrum was calculated for the final metabonomics analysis. During the measurements, room temperature was maintained at 25°C.

#### **UHPLC-LTQ-Orbitrap MS conditions**

All the sample analyses were performed on a DIONEX Ultimate 3000 UHPLC

system (Thermo Scientific, Bremen, Germany) with an ACQUITY UPLC HSS T3 column (100 mm × 2.1 mm, 1.8 μm; Waters Corp., Milford, MA, USA) at 40°C. A linear gradient elution program was conducted for chromatographic separation with 0.5% formic acid (solvent A) and acetonitrile (solvent B) as follows: 0-2 min, 5%-8% B; 2-7 min, 8%-10% B; 7-12 min, 10%-12% B; 12-15 min, 12%-16% B; 15-24 min, 16%-25% B; 24-26 min, 25%-95% B; 26-29 min, 95% B; 29-30 min, 95%-5% B, 30-33 min, 5% B. The flow rate was 0.3 mL·min<sup>-1</sup> and the injection volume was 2 μL.

The QC sample was run every 5 samples to guarantee the system stability.

High resolution MS analysis was performed on an LTQ-Orbitrap mass spectrometer (Thermo Scientific, Bremen, Germany) equipped with electrospray ionization (ESI) source operating in negative ion mode, and the parameters were set as follows: capillary temperature, 350°C; capillary voltage, 25 V; sheath gas flow rate, 30 arb; aux gas flow rate, 5 arb; spray voltage, 3.0 kV; tube lens, 110 V; scan ranges, *m/z* 100-1,000; collision-induced dissociation (CID) collision energy, 35%. To reduce analysis time and simultaneously trigger more target ions, the dynamic exclusion was selected. Other parameters were set as follows: repeat count, 5; repeat duration, 30 s; exclusion duration, 60 s. Meanwhile, to validate the identified sulfur-containing derivatives, an ultra-high-resolution of mass spectrometry (100,000 FWHM @ 400 *m/z*) in full scan mode was employed to screen the sulfur-containing derivatives.

**Figure captions:**

**Figure S1** The plane view of the reference chemical structures.

**Figure S2** Typical NIR, HPLC-DAD and total ion chromatogram (TIC) of the representative SF and NSF samples.

**Figure S3** The preprocess method for the NIR method for the PCA.

Baseline (A), spectroscopic transformation (B), multiplicative scatter correction (C), normalization (D), original (E), Savitzky-Golay smoothing with 9 points (SG(9)) plus first-order derivatives (F), SG(11) plus first-order derivatives (G), SG(11) plus second-order derivatives (H), standard normal variate transformation (I), and wavelet denosing of spectra (J).

**Figure S4** The preprocess method for the NIR method for the PLS-DA.

Baseline (A), spectroscopic transformation (B), multiplicative scatter correction (MSC, C), normalization (D), original (E), Savitzky-Golay smoothing with 9 points (SG(9)) plus first-order derivatives (F), SG(11) plus first-order derivatives (G), SG(11) plus second-order derivatives (H), standard normal variate transformation (I), and wavelet denosing of spectra (J).

**Figure S5** The fragmentation pathway of 5-CQA.

**Figure S6** Histogram of signal intensity of sulfur derivatives.

**Figure S7** The PCA results for the other SiPLS.

Baseline (A), spectroscopic transformation (B), multiplicative scatter correction (C), normalization (D), original (E), Savitzky-Golay smoothing with 9 points (SG(9)) plus

first-order derivatives (F), SG(9) plus second-order derivatives (H), SG(11) plus first-order derivatives (G), standard normal variate transformation (I), and wavelet denosing of spectra (J).

**Figure S8** The PLS-DA results for the other SiPLS.

Baseline (A), spectroscopic transformation (B), multiplicative scatter correction (C), normalization (D), original (E), Savitzky-Golay smoothing with 9 points (SG(9)) plus first-order derivatives (F), SG(9) plus second-order derivatives (H), SG(11) plus first-order derivatives (G), standard normal variate transformation (I), and wavelet denosing of spectra (J).

**Figure S9** The 2D-COS plot for the SF (A) and NSF (B) samples.

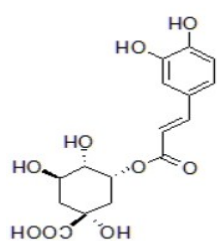

3-CQA

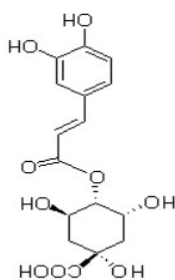

4-CQA

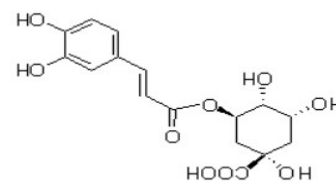

5-CQA

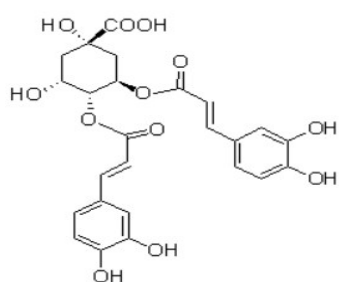

3,4-DiCQA

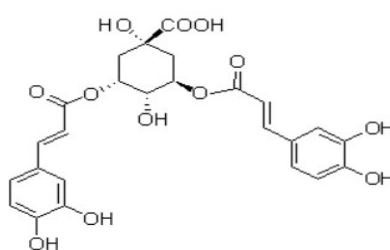

3,5-DiCQA

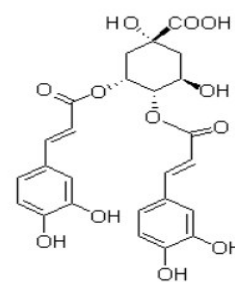

4,5-DiCQA

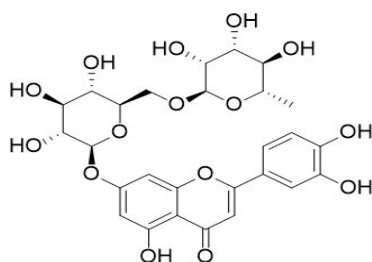

Lonicerin

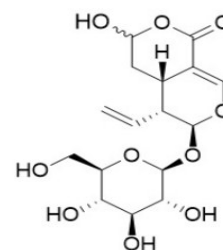

Secologanic acid

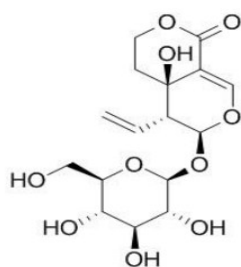

Swertiamarin

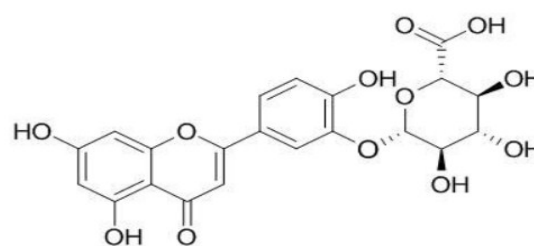

Luteolin 7-O- $\beta$ -glucoside

**Figure S1** The plane view of the reference chemical structures.

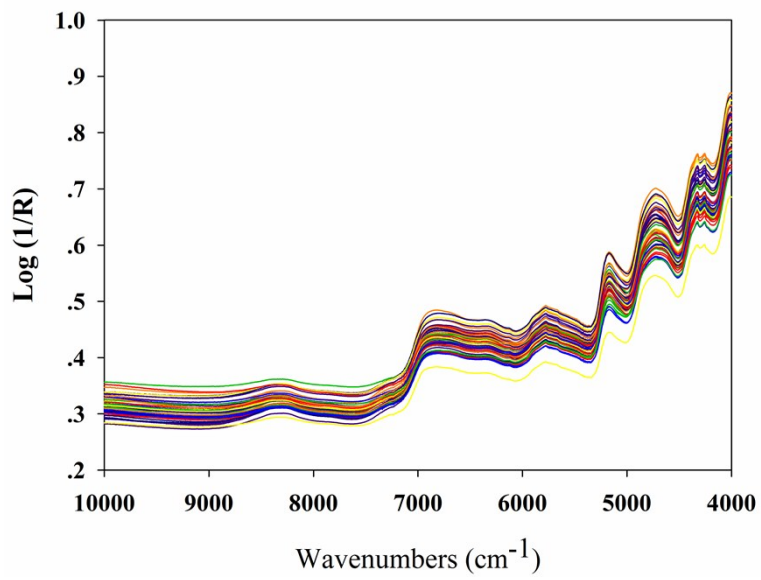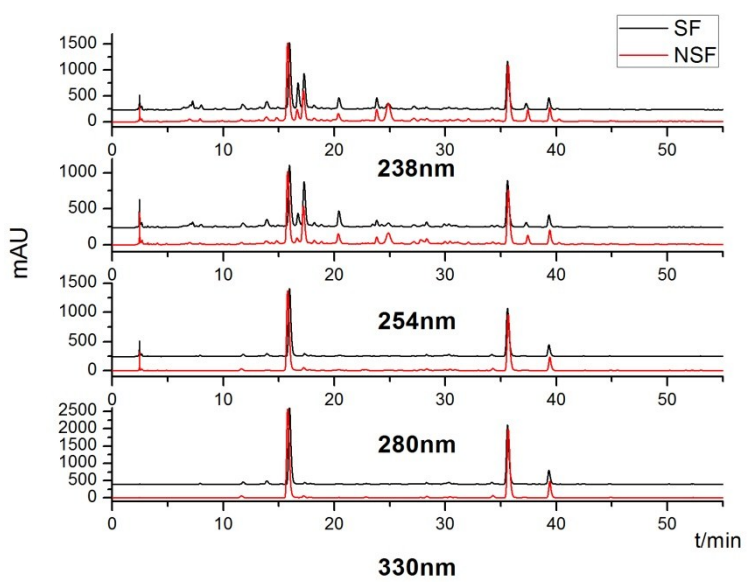

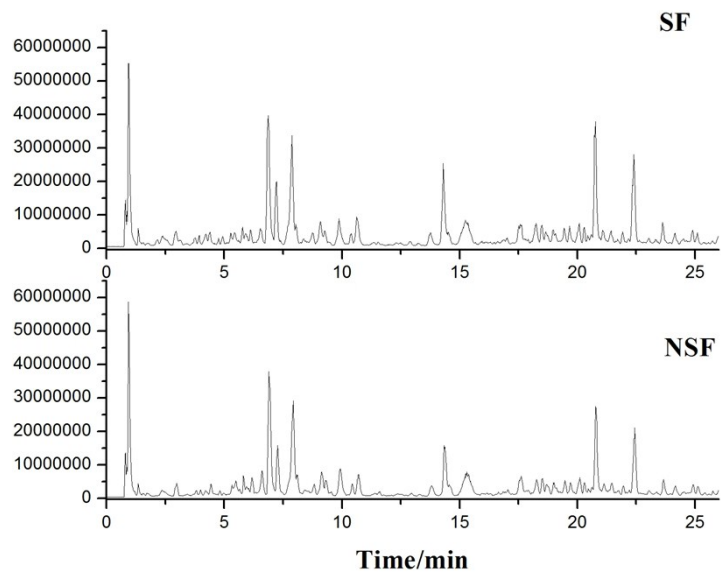

**Figure S2** Typical NIR, HPLC-DAD and total ion chromatogram (TIC) of the representative SF and NSF samples.



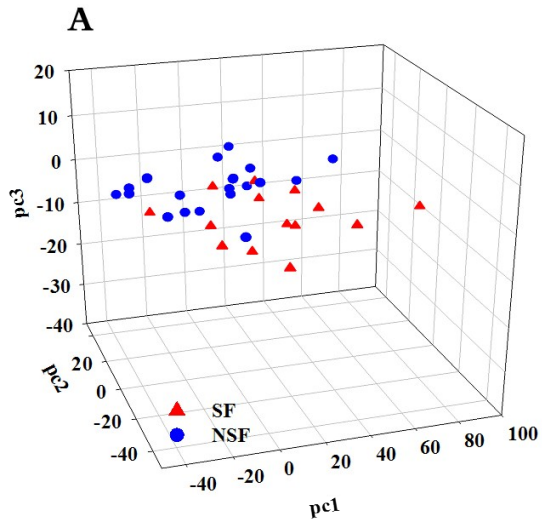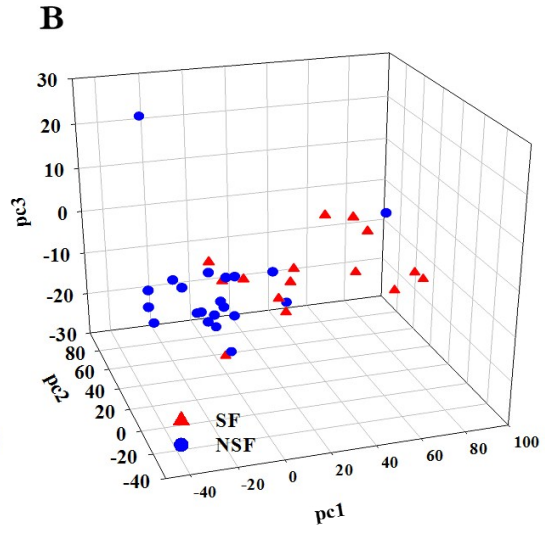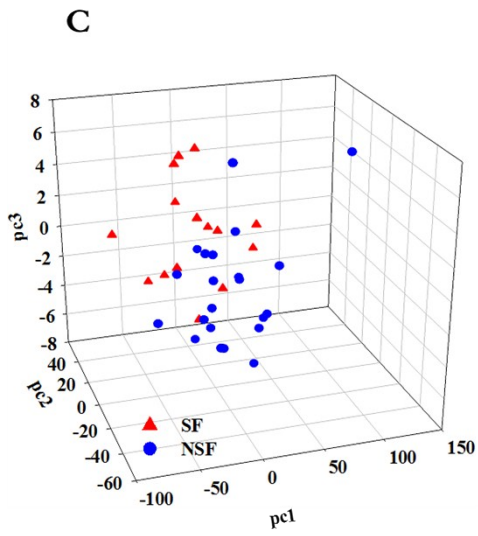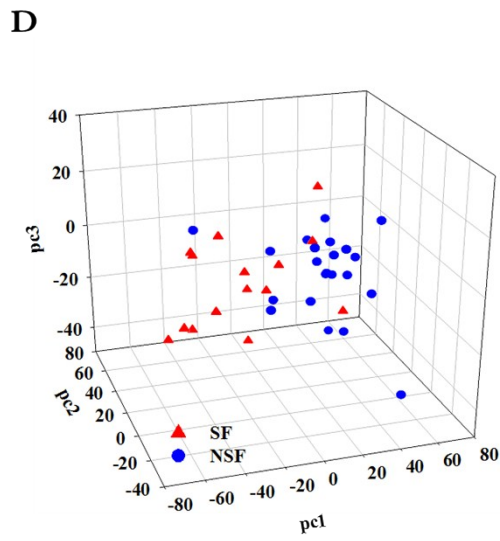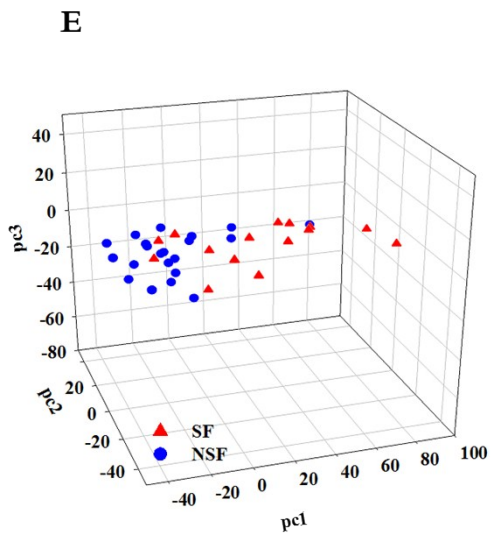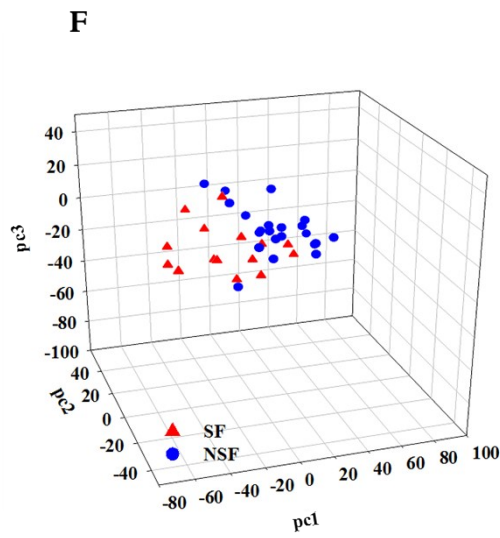

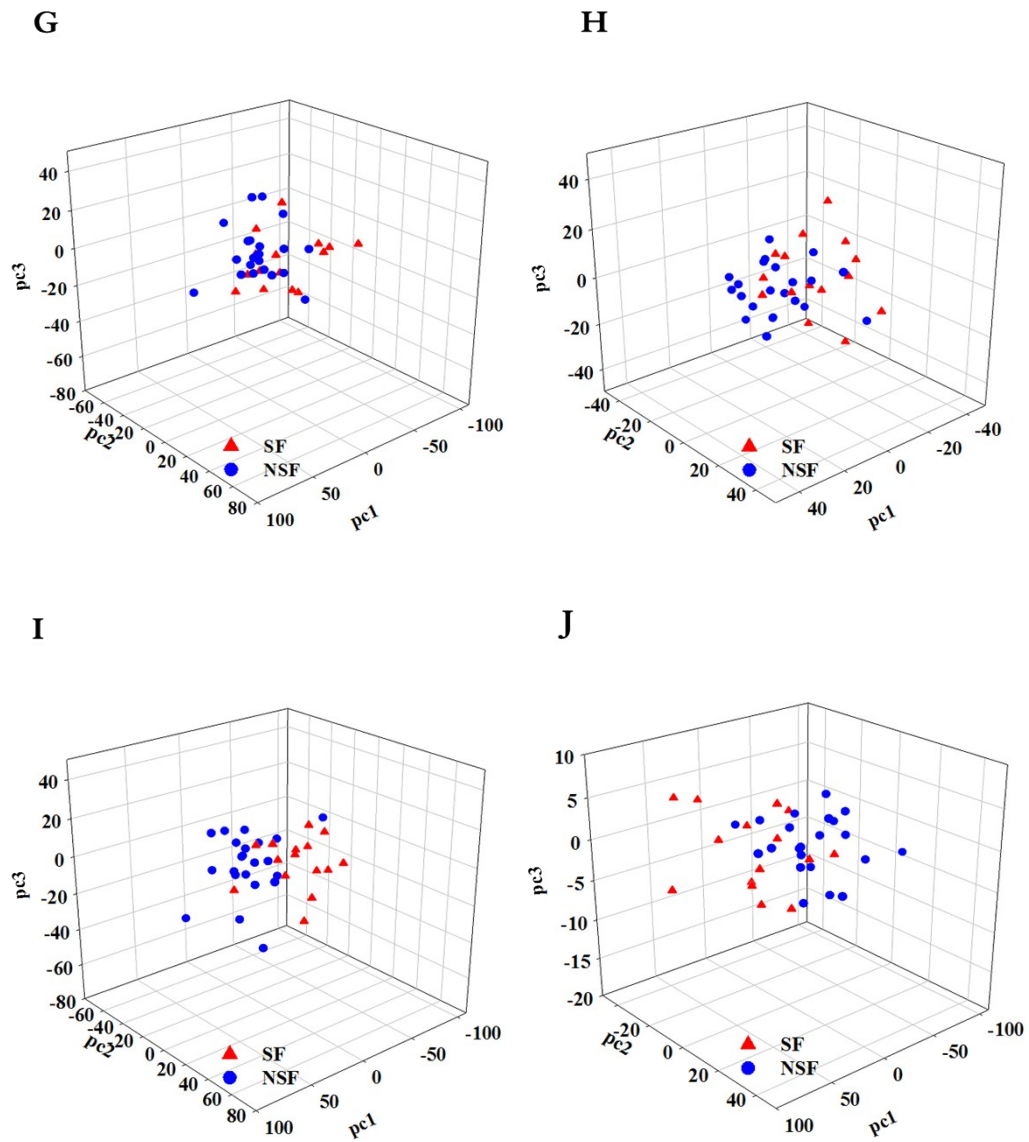

**Figure S3** The preprocess method for the NIR method for the PCA.

Baseline (A), spectroscopic transformation (B), multiplicative scatter correction (C), normalization (D), original (E), Savitzky-Golay smoothing with 9 points (SG(9)) plus first-order derivatives (F), SG(11) plus first-order derivatives (G), SG(11) plus second-order derivatives (H), standard normal variate transformation (I), and wavelet denosing of spectra (J).

**A**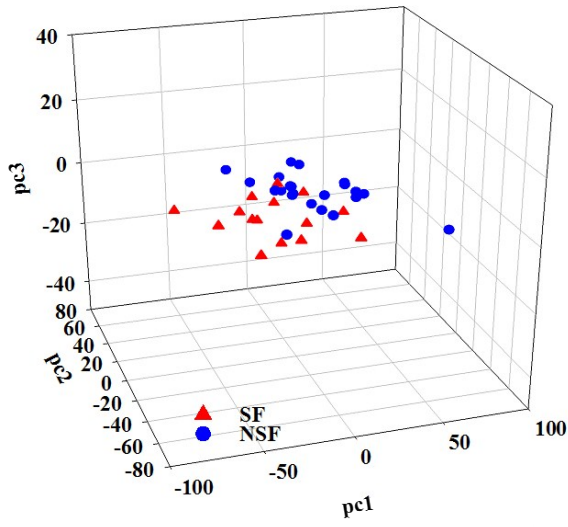**B**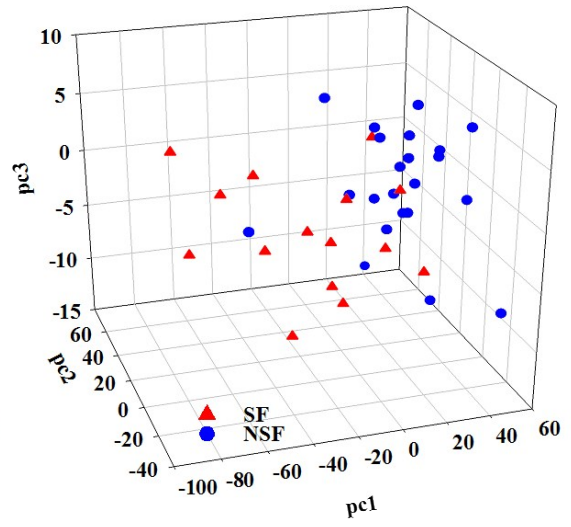**C**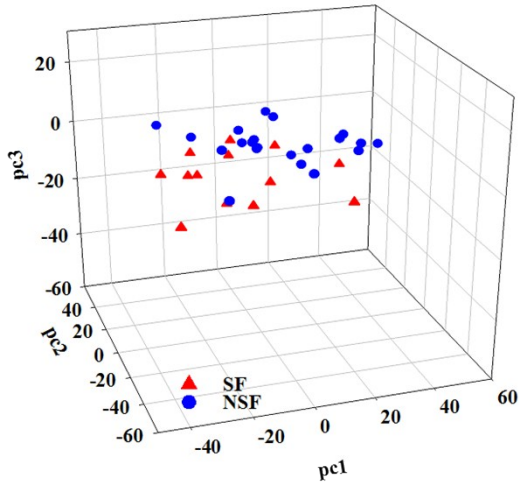**D**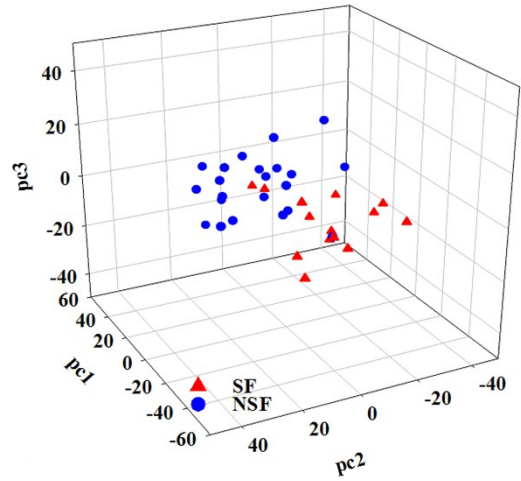**E**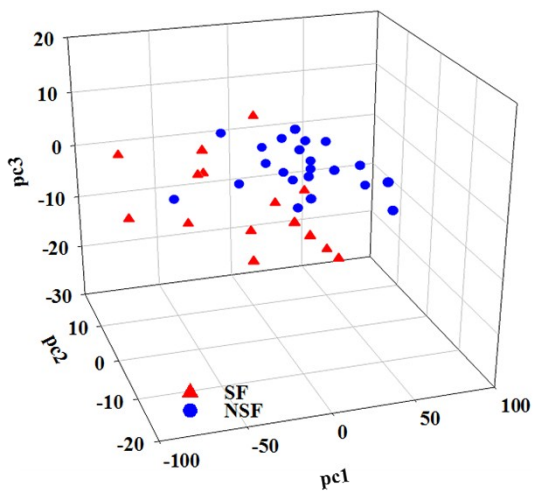**F**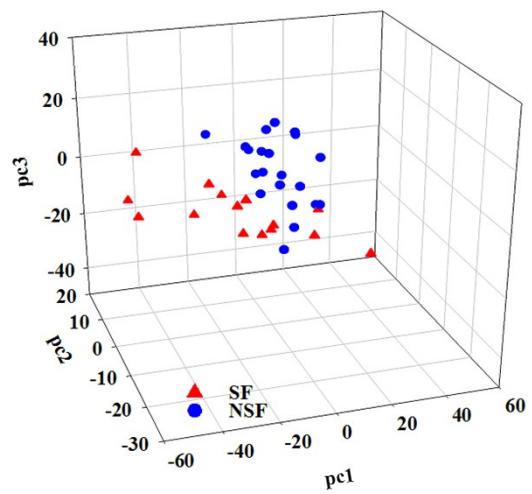

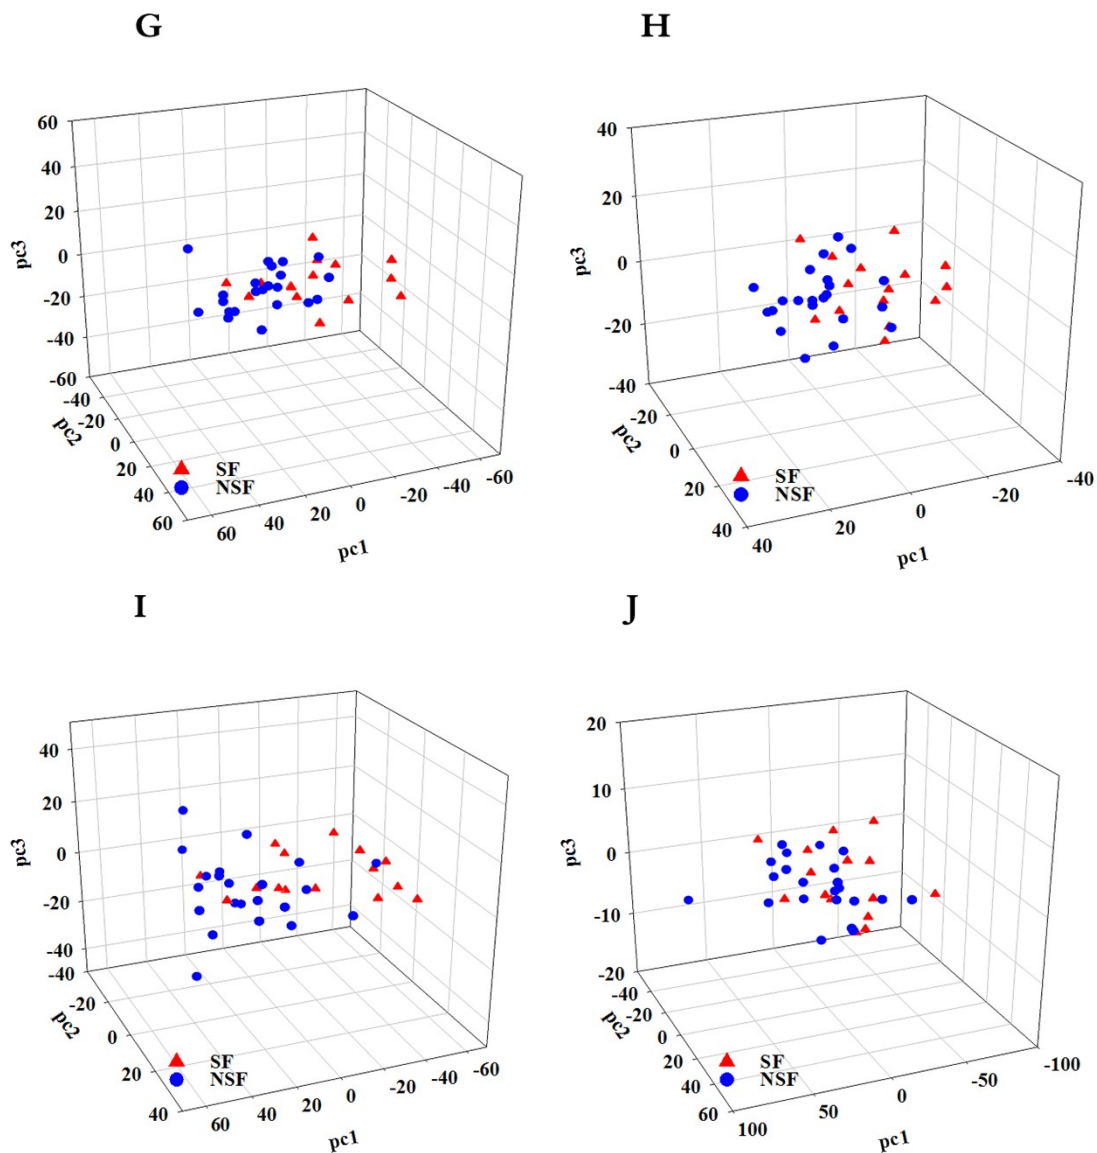

**Figure S4** The preprocess method for the NIR method for the PLS-DA.

Baseline (A), spectroscopic transformation (B), multiplicative scatter correction (MSC, C), normalization (D), original (E), Savitzky-Golay smoothing with 9 points (SG(9)) plus first-order derivatives (F), SG(11) plus first-order derivatives (G), SG(11) plus second-order derivatives (H), standard normal variate transformation (I), and wavelet denosing of spectra (J).

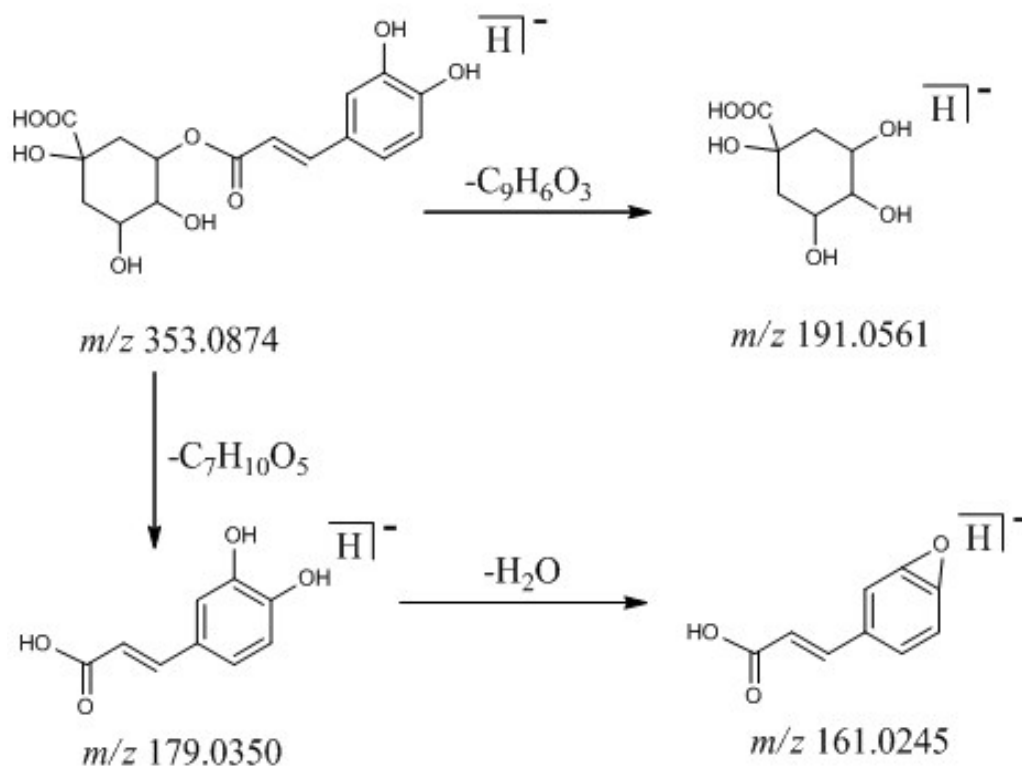

**Figure S5** The fragmentation pathway of 5-CQA.

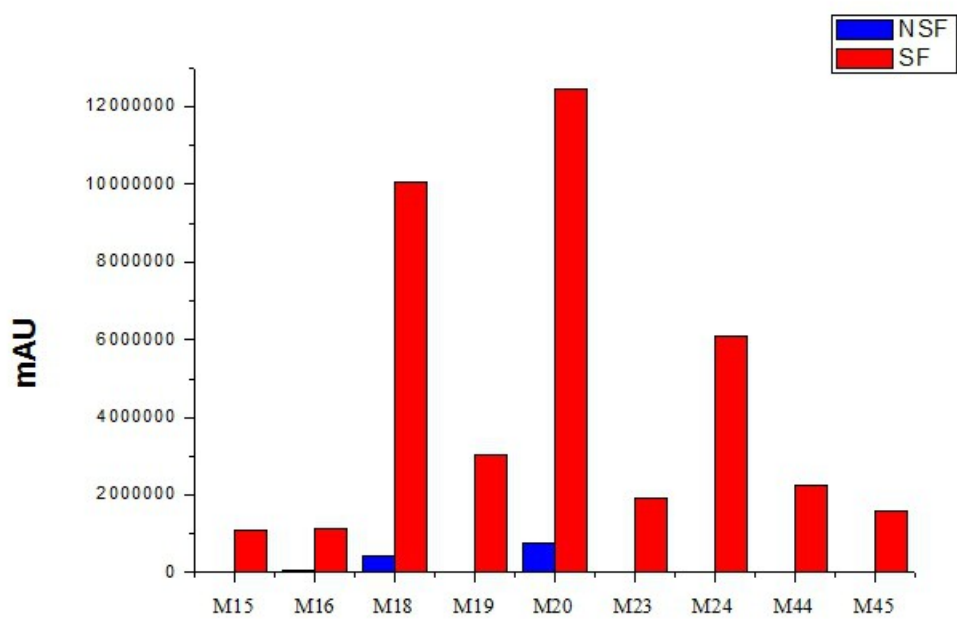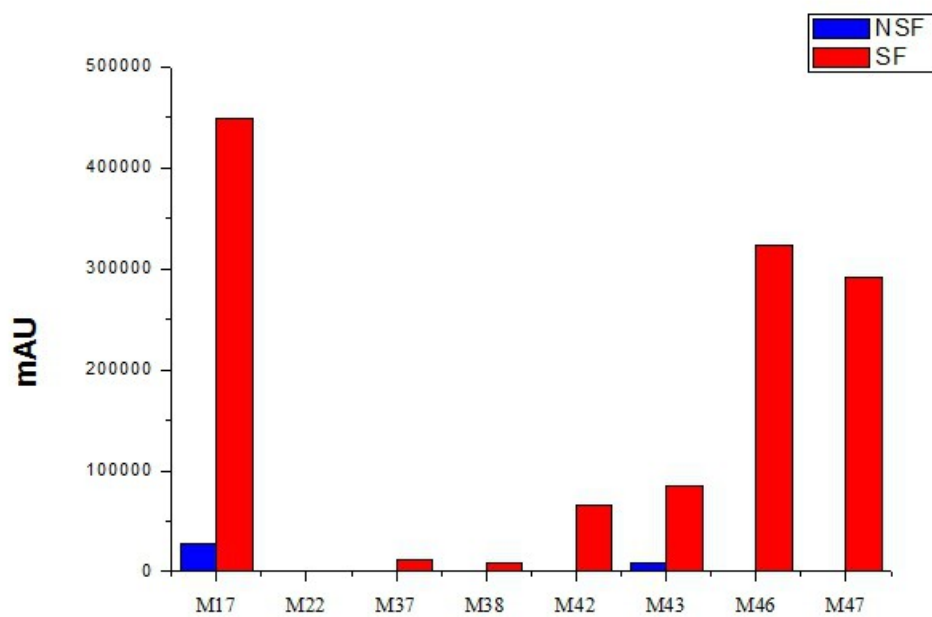

**Figure S6** Histogram of signal intensity of sulfur derivatives.

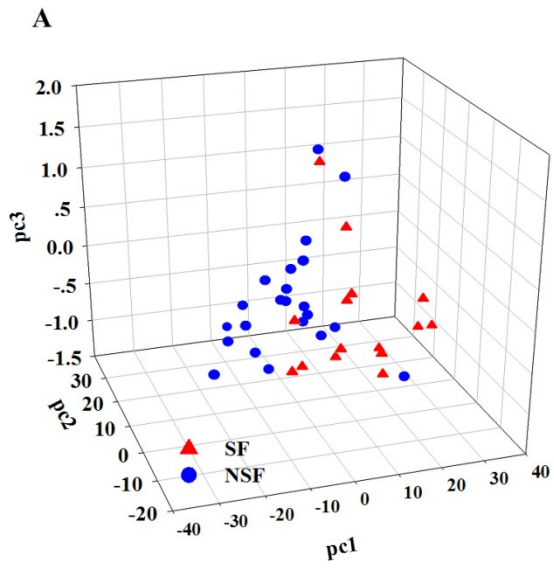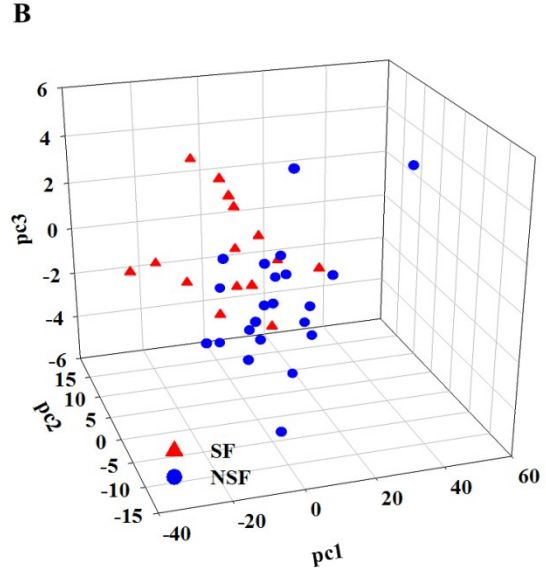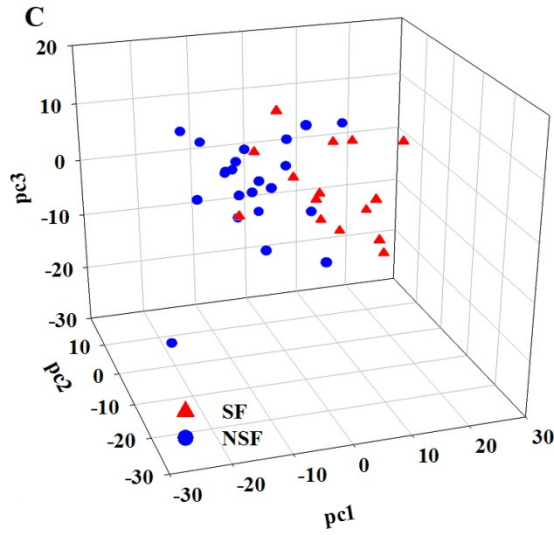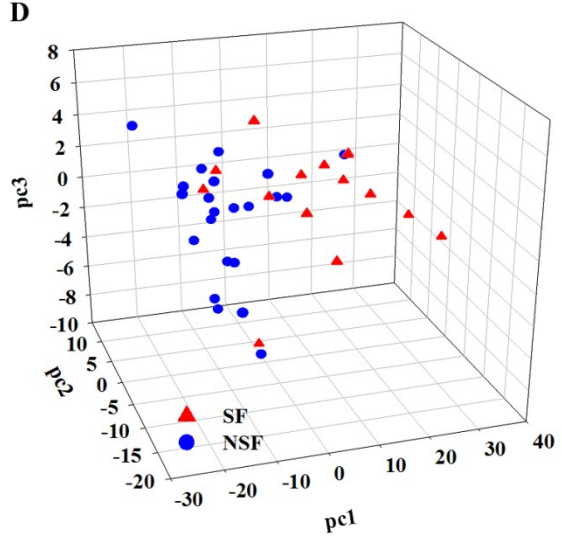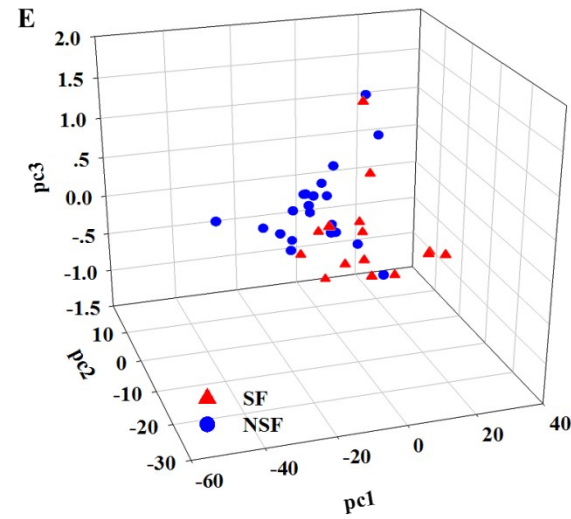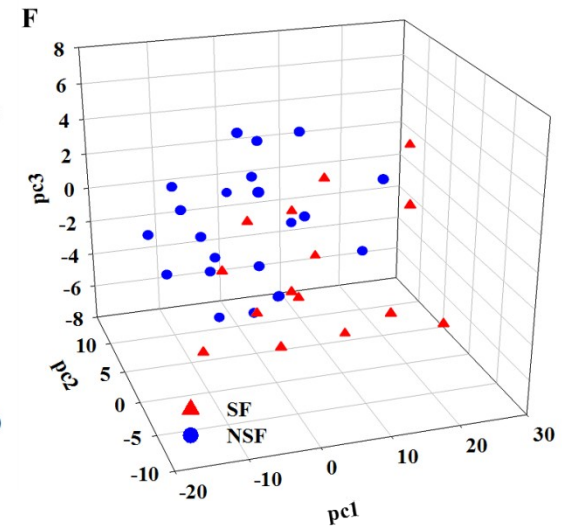

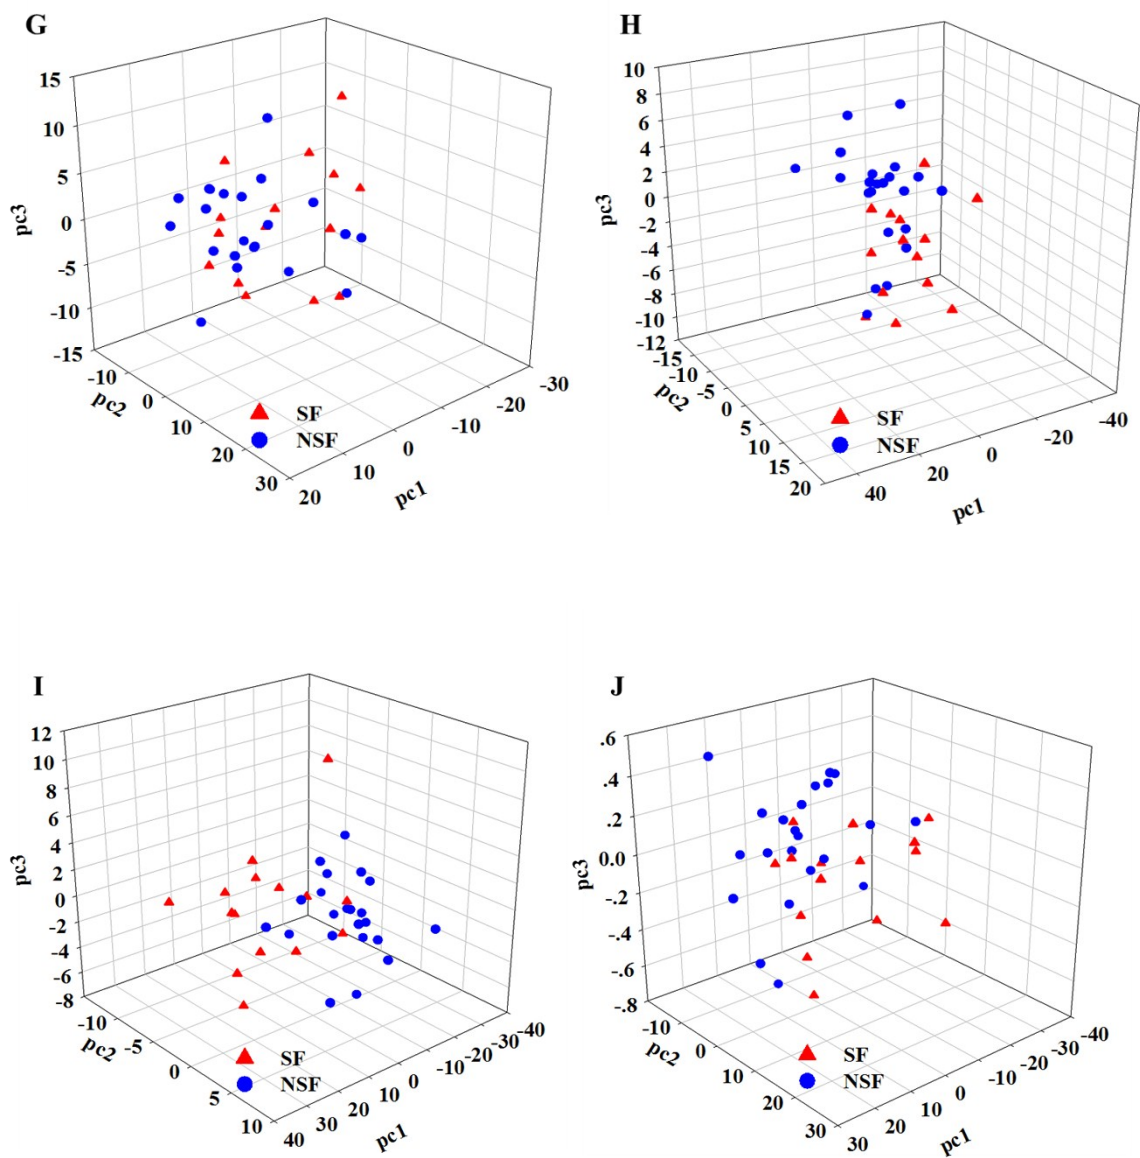

**Figure S7** The PCA results for the other SiPLS.

Baseline (A), spectroscopic transformation (B), multiplicative scatter correction (C), normalization (D), original (E), Savitzky-Golay smoothing with 9 points (SG(9)) plus first-order derivatives (F), SG(9) plus second-order derivatives (H), SG(11) plus first-order derivatives (G), standard normal variate transformation (I), and wavelet denosing of spectra (J).



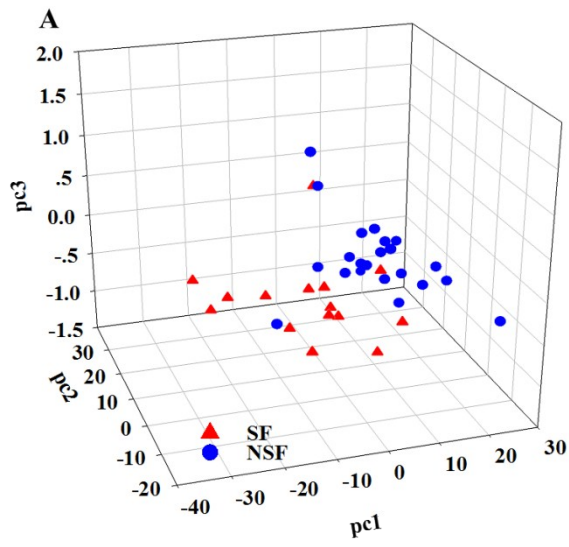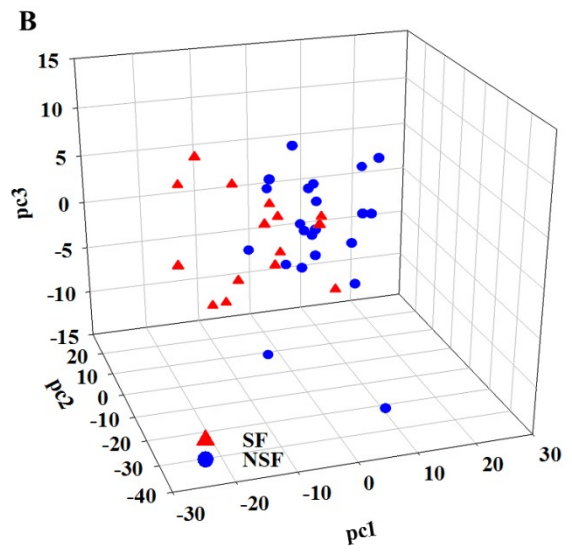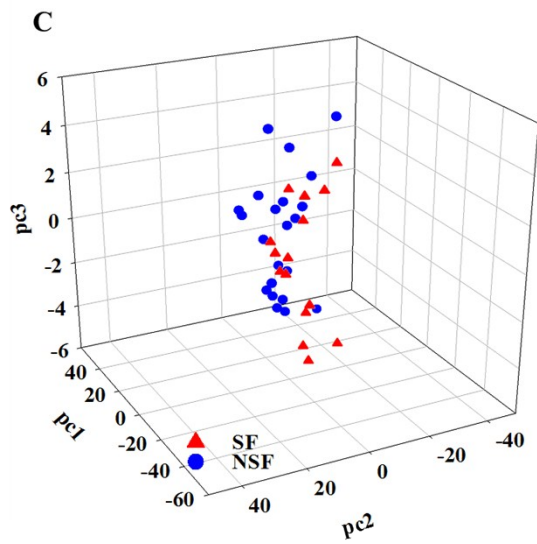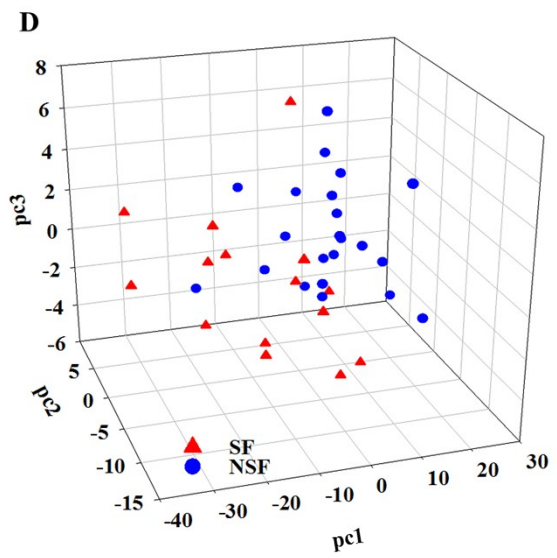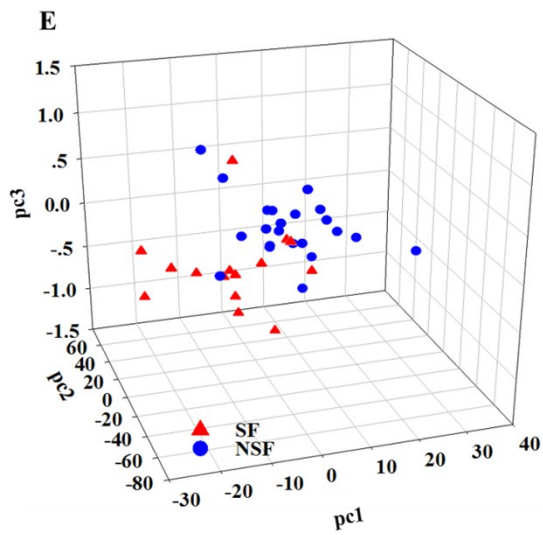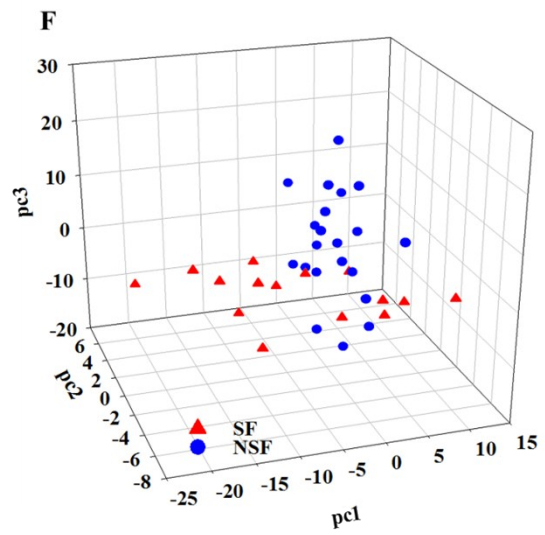

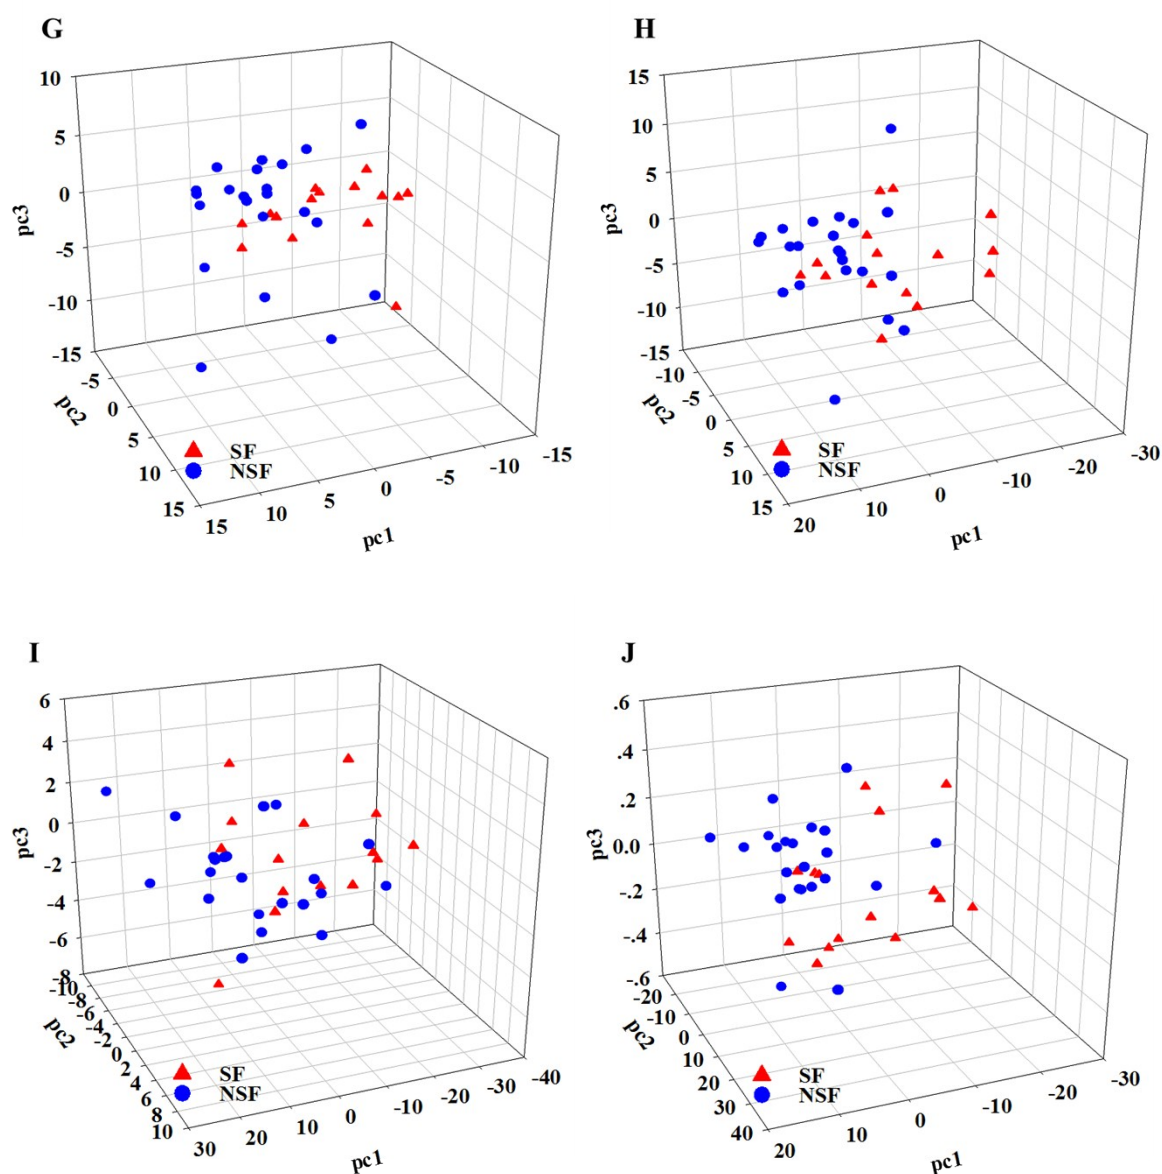

**Figure S8** The PLS-DA results for the other SiPLS.

Baseline (A), spectroscopic transformation (B), multiplicative scatter correction (C), normalization (D), original (E), Savitzky-Golay smoothing with 9 points (SG(9)) plus first-order derivatives (F), SG(9) plus second-order derivatives (H), SG(11) plus first-order derivatives (G), standard normal variate transformation (I), and wavelet denosing of spectra (J).

A

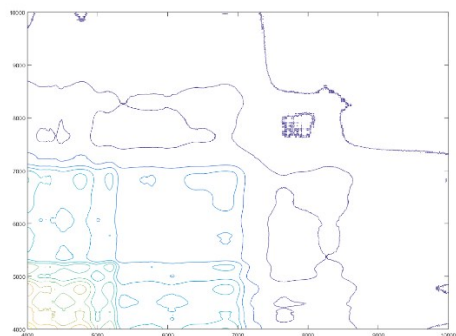

B

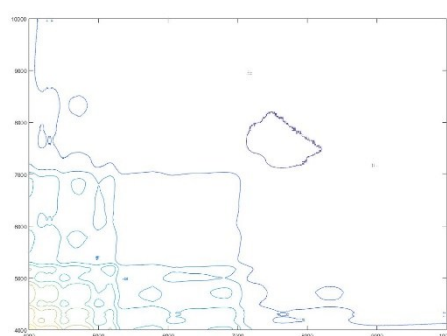

**Figure S9** The 2D-COS plot for the SF (A) and NSF (B) samples.

**Table captions:**

**Table S1** The detailed information of raw materials in commercial.

**Table S2** The reference standard information.

**Table S3** The results of preprocess method of the NIR.

**Table S4** The information for the 49 identified markers.

**Table S1** The detailed information of raw materials in commercial.

| No. | Code No. | Location                         |
|-----|----------|----------------------------------|
| 1   | FLJ-01-1 | Mixian city, Henan China         |
| 2   | FLJ-02-1 | Fengqiu city, Henan, China       |
| 3   | FLJ-03-1 | Fengqiu city, Henan, China       |
| 4   | FLJ-04-1 | Fengqiu city, Henan, China       |
| 5   | FLJ-05-1 | Fengqiu city, Henan, China       |
| 6   | FLJ-06-1 | Fengqiu city, Henan, China       |
| 7   | FLJ-07-1 | Fengqiu city, Henan, China       |
| 8   | FLJ-08-1 | Fengqiu city, Henan, China       |
| 9   | FLJ-09-1 | Pingyi city, Shandong, China     |
| 10  | FLJ-10-1 | Pingyi city, Shandong, China     |
| 11  | FLJ-11-1 | Pingyi city, Shandong, China     |
| 12  | FLJ-12-1 | Pingyi city, Shandong, China     |
| 13  | FLJ-13-1 | Pingyi city, Shandong, China     |
| 14  | FLJ-14-1 | Linyi city, Shandong, China      |
| 15  | FLJ-15-1 | Linyi city, Shandong, China      |
| 16  | FLJ-16-1 | Beijing city, Beijing, China     |
| 17  | FLJ-17-1 | Beijing city, Beijing, China     |
| 18  | FLJ-18-1 | Guangzhou city, Guangdong, China |
| 19  | FLJ-19-1 | Guangzhou city, Guangdong, China |

---

|    |                       |                                  |
|----|-----------------------|----------------------------------|
| 20 | FLJ-20-1              | Guangzhou city, Guangdong, China |
| 21 | FLJ-21-1              | Guangzhou city, Guangdong, China |
| 22 | FLJ-22-1              | Nanjing city, Jiangsu, China     |
| 23 | FLJ-01-2 <sup>Δ</sup> | Mixian city, Henan, China        |
| 24 | FLJ-02-2 <sup>Δ</sup> | Fengqiu city, Henan, China       |
| 25 | FLJ-03-2 <sup>Δ</sup> | Fengqiu city, Henan, China       |
| 26 | FLJ-04-2 <sup>Δ</sup> | Fengqiu city, Henan, China       |
| 27 | FLJ-05-2 <sup>Δ</sup> | Fengqiu city, Henan, China       |
| 28 | FLJ-06-2 <sup>Δ</sup> | Fengqiu city, Henan, China       |
| 29 | FLJ-07-2 <sup>Δ</sup> | Fengqiu city, Henan, China       |
| 30 | FLJ-08-2 <sup>Δ</sup> | Fengqiu city, Henan, China       |
| 31 | FLJ-09-2 <sup>Δ</sup> | Pingyi city, Shandong, China     |
| 32 | FLJ-10-2 <sup>Δ</sup> | Pingyi city, Shandong, China     |
| 33 | FLJ-11-2 <sup>Δ</sup> | Pingyi city, Shandong, China     |
| 34 | FLJ-12-2 <sup>Δ</sup> | Pingyi city, Shandong, China     |
| 35 | FLJ-13-2 <sup>Δ</sup> | Pingyi city, Shandong, China     |
| 36 | FLJ-14-2 <sup>Δ</sup> | Linyi city, Shandong, China      |
| 37 | FLJ-15-2 <sup>Δ</sup> | Linyi city, Shandong, China      |

---

<sup>Δ</sup>: Sulfur fumigated.

**Table S2** The reference standard information.

| Analytes                         | CAS        | Source                                | Content (%) |
|----------------------------------|------------|---------------------------------------|-------------|
| 3-Caffeoylquinic acid            | 906-33-2   | Chengdu Bio-purify Phytochemicals Ltd | >98.00      |
| 4-Caffeoylquinic acid            | 905-99-7   | Chengdu Bio-purify Phytochemicals Ltd | >98.00      |
| 5-Caffeoylquinic acid            | 327-97-9   | Chengdu Bio-purify Phytochemicals Ltd | >98.00      |
| 3,4-Dicaffeoylquinic acid        | 14534-61-3 | Chengdu Bio-purify Phytochemicals Ltd | >98.00      |
| 3,5-Dicaffeoylquinic acid        | 2450-53-5  | Chengdu Bio-purify Phytochemicals Ltd | >98.00      |
| 4,5-Dicaffeoylquinic acid        | 32451-88-0 | Chengdu Bio-purify Phytochemicals Ltd | >98.00      |
| Lonicerin                        | 25694-72-8 | Chengdu Bio-purify Phytochemicals Ltd | >98.00      |
| Secologanic acid                 | 60077-40-5 | Chengdu Bio-purify Phytochemicals Ltd | >98.00      |
| Swertiamarin                     | 17388-39-5 | Chengdu Bio-purify Phytochemicals Ltd | >98.00      |
| Luteolin 7-O- $\beta$ -glucoside | 53527-42-7 | Chengdu Bio-purify Phytochemicals Ltd | >98.00      |

**Table S3** The results of preprocess method of the NIR

| Preprocess<br>methods        | PCA |                             |                | PLS-DA |                             |                             |                |
|------------------------------|-----|-----------------------------|----------------|--------|-----------------------------|-----------------------------|----------------|
|                              | LVs | R <sup>2</sup> <sub>x</sub> | Q <sup>2</sup> | lv     | R <sup>2</sup> <sub>x</sub> | R <sup>2</sup> <sub>y</sub> | Q <sup>2</sup> |
| Baseline                     | 5   | 0.995                       | 0.983          | 3      | 0.952                       | 0.475                       | 0.275          |
| spectroscopic transformation | 4   | 0.997                       | 0.996          | 3      | 0.991                       | 0.491                       | 0.260          |
| msc                          | 9   | 0.997                       | 0.992          | 3      | 0.846                       | 0.545                       | 0.251          |
| normalization                | 6   | 0.998                       | 0.996          | 3      | 0.952                       | 0.507                       | 0.293          |
| original                     | 4   | 0.997                       | 0.996          | 3      | 0.991                       | 0.495                       | 0.267          |
| SG91 <sup>st</sup>           | 7   | 0.778                       | 0.609          | 3      | 0.551                       | 0.797                       | 0.237          |
| SG92 <sup>nd</sup>           | 5   | 0.39                        | 0.109          | 3      | 0.228                       | 0.972                       | 0.552          |
| SG111 <sup>st</sup>          | 7   | 0.817                       | 0.673          | 3      | 0.569                       | 0.764                       | 0.221          |
| SG112 <sup>nd</sup>          | 5   | 0.425                       | 0.154          | 4      | 0.307                       | 0.990                       | 0.639          |
| snv                          | 8   | 0.996                       | 0.989          | 3      | 0.848                       | 0.547                       | 0.250          |
| wds                          | 4   | 0.998                       | 0.997          | 3      | 0.992                       | 0.474                       | 0.237          |

Multiplicative scatter correction (MSC), Savitzky-Golay smoothing with 9 points (SG(9)) plus first-order derivatives (SG 91<sup>st</sup>), SG(11) plus first-order derivatives (SG 92<sup>nd</sup>), SG(11) plus first-order derivatives (SG 111<sup>st</sup>), SG(11) plus second-order derivatives (SG 112<sup>nd</sup>), standard normal variate transformation (SNV), and wavelet denosing of spectra (WDS).

LVs: the number of latent variables.



**Table S4** The information for the 49 identified markers.

| No              | t <sub>R</sub> | Experimental Mass | Relative intensity    | Formular [M-H] <sup>-</sup>                       | MS/MS fragment ions                           | Identification                                     |
|-----------------|----------------|-------------------|-----------------------|---------------------------------------------------|-----------------------------------------------|----------------------------------------------------|
| 1               | 2.14           | 373.1122          | 4.36×10 <sup>6</sup>  | C <sub>16</sub> H <sub>21</sub> O <sub>10</sub>   | MS <sup>2</sup> [373]:193,149,167,179,119     | Swertiamarin                                       |
| 2 <sup>#</sup>  | 5.30           | 373.1118          | 1.23×10 <sup>6</sup>  | C <sub>16</sub> H <sub>21</sub> O <sub>10</sub>   | MS <sup>2</sup> [373]:211,167,149,193,179     | Secologanic acid                                   |
| 3               | 7.88           | 373.1118          | 9.69×10 <sup>6</sup>  | C <sub>16</sub> H <sub>21</sub> O <sub>10</sub>   | MS <sup>2</sup> [373]:193,149,167,179         | Swertiamarin isomer                                |
| 4               | 3.15           | 437.0720          | 3.15×10 <sup>6</sup>  | C <sub>16</sub> H <sub>21</sub> O <sub>12</sub> S | MS <sup>2</sup> [437]:193,149,373,355         | Secologanic acid+SO <sub>2</sub>                   |
| 5               | 1.93           | 455.0836          | 3.35×10 <sup>6</sup>  | C <sub>16</sub> H <sub>23</sub> O <sub>13</sub> S | MS <sup>2</sup> [455]:373,411,437,193,211     | Secologanic acid +H <sub>2</sub> SO <sub>3</sub>   |
| 6               | 2.15           | 455.0822          | 5.08×10 <sup>6</sup>  | C <sub>16</sub> H <sub>23</sub> O <sub>13</sub> S | MS <sup>2</sup> [455]:373,437,411,193,211     | Secologanic acid +H <sub>2</sub> SO <sub>3</sub>   |
| 7               | 1.81           | 391.1231          | 1.64×10 <sup>5</sup>  | C <sub>16</sub> H <sub>23</sub> O <sub>11</sub>   | MS <sup>2</sup> [391]:229,211,193,185,167,149 | Secologanic acid +H <sup>+</sup> /H <sub>2</sub> O |
| 8               | 2.45           | 391.1255          | 8.88×10 <sup>5</sup>  | C <sub>16</sub> H <sub>23</sub> O <sub>11</sub>   | MS <sup>2</sup> [391]:211,229,193,167,149,185 | Secologanic acid +H <sup>+</sup> /H <sub>2</sub> O |
| 9 <sup>#</sup>  | 4.47           | 353.0869          | 2.34×10 <sup>6</sup>  | C <sub>16</sub> H <sub>17</sub> O <sub>9</sub>    | MS <sup>2</sup> [353]:191,179,135             | 3-CQA                                              |
| 10 <sup>#</sup> | 6.91           | 353.0858          | 1.81×10 <sup>7</sup>  | C <sub>16</sub> H <sub>17</sub> O <sub>9</sub>    | MS <sup>2</sup> [353]:191,179,161             | 5-CQA                                              |
| 11 <sup>#</sup> | 7.73           | 353.0856          | 1.24×10 <sup>6</sup>  | C <sub>16</sub> H <sub>17</sub> O <sub>9</sub>    | MS <sup>2</sup> [353]:173,179,191,135         | 4-CQA                                              |
| 12              | 4.23           | 375.1292          | 1.242×10 <sup>6</sup> | C <sub>16</sub> H <sub>23</sub> O <sub>10</sub>   | MS <sup>2</sup> [375]:213,169,151             | Loganin acid isomer                                |
| 13 <sup>#</sup> | 4.84           | 375.1280          | 6.51×10 <sup>5</sup>  | C <sub>16</sub> H <sub>23</sub> O <sub>10</sub>   | MS <sup>2</sup> [375]:213,169,151,195         | Loganin acid isomer                                |
| 14              | 5.84           | 375.1273          | 1.67×10 <sup>6</sup>  | C <sub>16</sub> H <sub>23</sub> O <sub>10</sub>   | MS <sup>2</sup> [375]:213,169,151             | Loganin acid isomer                                |
| 15              | 6.63           | 375.1292          | 23.×10 <sup>6</sup>   | C <sub>16</sub> H <sub>23</sub> O <sub>10</sub>   | MS <sup>2</sup> [375]:195,151,                | Loganin acid isomer                                |

|                 |       |          |                      |                                                   |                                               |                                        |
|-----------------|-------|----------|----------------------|---------------------------------------------------|-----------------------------------------------|----------------------------------------|
| 16 <sup>#</sup> | 14.33 | 403.1223 | 7.88×10 <sup>6</sup> | C <sub>17</sub> H <sub>23</sub> O <sub>11</sub>   | MS <sup>2</sup> [403]: 371,223,179,121,91     | Secologanin                            |
| 17              | 1.63  | 433.0428 | 5.21×10 <sup>6</sup> | C <sub>16</sub> H <sub>17</sub> O <sub>12</sub> S | MS <sup>2</sup> [433]:241,415,353,161,191,287 | CQA+SO <sub>3</sub>                    |
| 18              | 2.53  | 433.0427 | 1.60×10 <sup>6</sup> | C <sub>16</sub> H <sub>17</sub> O <sub>12</sub> S | MS <sup>2</sup> [433]:415,387,353,241,353     | CQA+SO <sub>3</sub>                    |
| 19              | 2.66  | 433.0433 | 1.90×10 <sup>6</sup> | C <sub>16</sub> H <sub>17</sub> O <sub>12</sub> S | MS <sup>2</sup> [433]:241,415,387,259,353     | CQA+SO <sub>3</sub>                    |
| 20              | 4.62  | 433.0423 | 3.36×10 <sup>6</sup> | C <sub>16</sub> H <sub>17</sub> O <sub>12</sub> S | MS <sup>2</sup> [433]:415.387,259             | CQA+SO <sub>3</sub>                    |
| 21              | 5.01  | 433.0419 | 4.98×10 <sup>6</sup> | C <sub>16</sub> H <sub>17</sub> O <sub>12</sub> S | MS <sup>2</sup> [433]:415,241,161,259,387     | CQA+SO <sub>3</sub>                    |
| 22              | 1.12  | 435.0591 | 2.40×10 <sup>5</sup> | C <sub>16</sub> H <sub>17</sub> O <sub>12</sub> S | MS <sup>2</sup> [435]:353,191,179             | CQA+H <sub>2</sub> SO <sub>3</sub>     |
| 23 <sup>#</sup> | 19.06 | 447.0918 | 2.48×10 <sup>6</sup> | C <sub>21</sub> H <sub>19</sub> O <sub>11</sub>   | MS <sup>2</sup> [447]:285                     | Luteolin-7- <i>O</i> -glucoside        |
| 24              | 21.06 | 447.0916 | 5.90×10 <sup>5</sup> | C <sub>21</sub> H <sub>19</sub> O <sub>11</sub>   | MS <sup>2</sup> [447]:285                     | Luteolin-7- <i>O</i> -glucoside isomer |
| 25              | 18.22 | 463.0861 | 1.38×10 <sup>6</sup> | C <sub>21</sub> H <sub>19</sub> O <sub>12</sub>   | MS <sup>2</sup> [463]:301,271,445             | Hyperoside isomer                      |
| 26 <sup>#</sup> | 18.73 | 463.0854 | 2.01×10 <sup>6</sup> | C <sub>21</sub> H <sub>19</sub> O <sub>12</sub>   | MS <sup>2</sup> [463]:301,445,271             | Hyperoside                             |
| 27              | 23.05 | 499.1231 | 9.51×10 <sup>4</sup> | C <sub>25</sub> H <sub>23</sub> O <sub>11</sub>   | MS <sup>2</sup> [499]:337,173,335,353         | 4-PCo-1-CQA                            |
| 28              | 23.49 | 499.1233 | 1.11×10 <sup>5</sup> | C <sub>25</sub> H <sub>23</sub> O <sub>11</sub>   | MS <sup>2</sup> [499]:353,337,191,335,179     | 5-PCo-3-CQA                            |
| 29              | 25.21 | 499.1230 | 1.73×10 <sup>6</sup> | C <sub>25</sub> H <sub>23</sub> O <sub>11</sub>   | MS <sup>2</sup> [499]:353,337,179,191         | 3-PCo-4-CQA                            |
| 30 <sup>#</sup> | 20.36 | 515.1155 | 3.46×10 <sup>6</sup> | C <sub>25</sub> H <sub>23</sub> O <sub>11</sub>   | MS <sup>2</sup> [515]:353,335,173,179         | 3,4-DiCQA                              |
| 31 <sup>#</sup> | 20.85 | 515.1155 | 4.38×10 <sup>6</sup> | C <sub>25</sub> H <sub>23</sub> O <sub>11</sub>   | MS <sup>2</sup> [515]:353,191,179,335         | 3,5-DiCQA                              |
| 32 <sup>#</sup> | 22.44 | 515.1163 | 7.30×10 <sup>6</sup> | C <sub>25</sub> H <sub>23</sub> O <sub>11</sub>   | MS <sup>2</sup> [515]:353,191,179,335,353     | 4,5-DiCQA                              |

|                 |       |           |                    |                                                   |                                               |                                                       |
|-----------------|-------|-----------|--------------------|---------------------------------------------------|-----------------------------------------------|-------------------------------------------------------|
| 33              | 16.70 | 595.0750  | $1.56 \times 10^5$ | C <sub>25</sub> H <sub>23</sub> O <sub>15</sub> S | MS <sup>2</sup> [595]:549,577,415,241,259     | DiCQA+SO <sub>3</sub>                                 |
| 34              | 16.98 | 595.0748  | $3.37 \times 10^5$ | C <sub>25</sub> H <sub>23</sub> O <sub>15</sub> S | MS <sup>2</sup> [595]:549,577,415,301,397     | DiCQA+SO <sub>3</sub>                                 |
| 35              | 17.61 | 595.0737  | $2.62 \times 10^6$ | C <sub>25</sub> H <sub>23</sub> O <sub>15</sub> S | MS <sup>2</sup> [595]:577,549,415,433,241,259 | DiCQA+SO <sub>3</sub>                                 |
| 36              | 17.89 | 595.0745  | $5.84 \times 10^5$ | C <sub>25</sub> H <sub>23</sub> O <sub>15</sub> S | MS <sup>2</sup> [595]:577,549,415,433,241,259 | DiCQA+SO <sub>3</sub>                                 |
| 37              | 19.38 | 595.0745  | $6.70 \times 10^5$ | C <sub>25</sub> H <sub>23</sub> O <sub>15</sub> S | MS <sup>2</sup> [595]:577,549,415,433,259     | DiCQA+SO <sub>3</sub>                                 |
| 38              | 21.25 | 595.0737  | $6.75 \times 10^5$ | C <sub>25</sub> H <sub>23</sub> O <sub>15</sub> S | MS <sup>2</sup> [595]:577,415,549,433,259,241 | DiCQA+SO <sub>3</sub>                                 |
| 39              | 23.82 | 529.1343  | $5.65 \times 10^4$ | C <sub>26</sub> H <sub>25</sub> O <sub>12</sub>   | MS <sup>2</sup> [529]:367,179,335,353,193     | 3-C-4-FQA                                             |
| 40              | 24.60 | 529.1340  | $7.14 \times 10^4$ | C <sub>26</sub> H <sub>25</sub> O <sub>12</sub>   | MS <sup>2</sup> [529]:353,367,191,179         | 5-C-3-FQA                                             |
| 41              | 25.86 | 529.1335  | $1.27 \times 10^5$ | C <sub>26</sub> H <sub>25</sub> O <sub>12</sub>   | MS <sup>2</sup> [529]:353,367,173,335         | <i>Cis</i> -5-C-3-FQA                                 |
| 42 <sup>#</sup> | 18.30 | 609.14038 | $2.69 \times 10^6$ | C <sub>27</sub> H <sub>29</sub> O <sub>16</sub>   | MS <sup>2</sup> [609]:301,300,271,255,179,591 | Rutin                                                 |
| 43              | 18.80 | 593.1488  | $6.08 \times 10^5$ | C <sub>27</sub> H <sub>29</sub> O <sub>15</sub>   | MS <sup>2</sup> [593]:285,447                 | Lonicerin isomer                                      |
| 44              | 19.71 | 593.1483  | $1.51 \times 10^6$ | C <sub>27</sub> H <sub>29</sub> O <sub>15</sub>   | MS <sup>2</sup> [593]:285,447                 | Lonicerin isomer                                      |
| 45 <sup>#</sup> | 20.50 | 593.1486  | $9.56 \times 10^5$ | C <sub>27</sub> H <sub>29</sub> O <sub>15</sub>   | MS <sup>2</sup> [593]:285                     | Lonicerin                                             |
| 46 <sup>#</sup> | 22.70 | 607.1653  | $2.84 \times 10^5$ | C <sub>28</sub> H <sub>31</sub> O <sub>15</sub>   | MS <sup>2</sup> [607]:299                     | Chrysoeriol-7- <i>O</i> - $\beta$ -D-neohesperidoside |
| 47              | 8.73  | 543.0431  | $2.67 \times 10^5$ | C <sub>21</sub> H <sub>19</sub> O <sub>15</sub> S | MS <sup>2</sup> [543]:463,381,525,301         | Hyperoside+SO <sub>3</sub>                            |
| 48              | 12.76 | 543.0432  | $8.61 \times 10^4$ | C <sub>21</sub> H <sub>19</sub> O <sub>15</sub> S | MS <sup>2</sup> [543]:381,301,381,463         | Hyperoside +SO <sub>3</sub>                           |

---

|    |       |          |                    |                       |                                    |                                                  |
|----|-------|----------|--------------------|-----------------------|------------------------------------|--------------------------------------------------|
| 49 | 17.34 | 527.0494 | $1.08 \times 10^5$ | $C_{21}H_{19}O_{14}S$ | MS <sup>2</sup> [527]:447, 285,481 | Luteolin-7- <i>O</i> -glucoside +SO <sub>3</sub> |
|----|-------|----------|--------------------|-----------------------|------------------------------------|--------------------------------------------------|

---
